# Supplementary material for: Mesoporous Fe3O4/SiO2/poly(2-carboxyethyl acrylate) composite polymer particles for pH-responsive loading and targeted release of bioactive molecules
Source: Royal Society of Chemistry journal article supplement (doi:10.1039/d4ra03160a), 2024-01-01
Supplement: d4ra03160a1.pdf [file d4ra03160a1.pdf]

# Supplementary Material

## **Mesoporous Fe<sub>3</sub>O<sub>4</sub>/SiO<sub>2</sub>/poly(2-carboxyethyl acrylate) composite polymer particles for pH-responsive loading and targeted release of bioactive molecules**

Most. Nusrat Jahan,<sup>a</sup> Md. Ashraful Alam,<sup>a</sup> Md. Mahabur Rahman,<sup>a,b</sup> S. Manjura Hoque,<sup>c</sup>  
Hasan Ahmad<sup>a\*</sup>

*<sup>a</sup>Research Laboratory of Polymer Colloids and Nanomaterials, Department of Chemistry, Rajshahi University, Rajshahi 6205, Bangladesh*

*<sup>b</sup>Department of Chemistry, Pabna University of Science and Technology, 6600 Pabna, Bangladesh*

*<sup>c</sup>Materials Science Division, Bangladesh Atomic Energy Commission, Dhaka, Bangladesh*

\*Corresponding author.

E-mail address: [samarhass@yahoo.com](mailto:samarhass@yahoo.com); [hahmad@ru.ac.bd](mailto:hahmad@ru.ac.bd)

ORCID

Hasan Ahmad: [0000-0003-1499-167X](https://orcid.org/0000-0003-1499-167X)

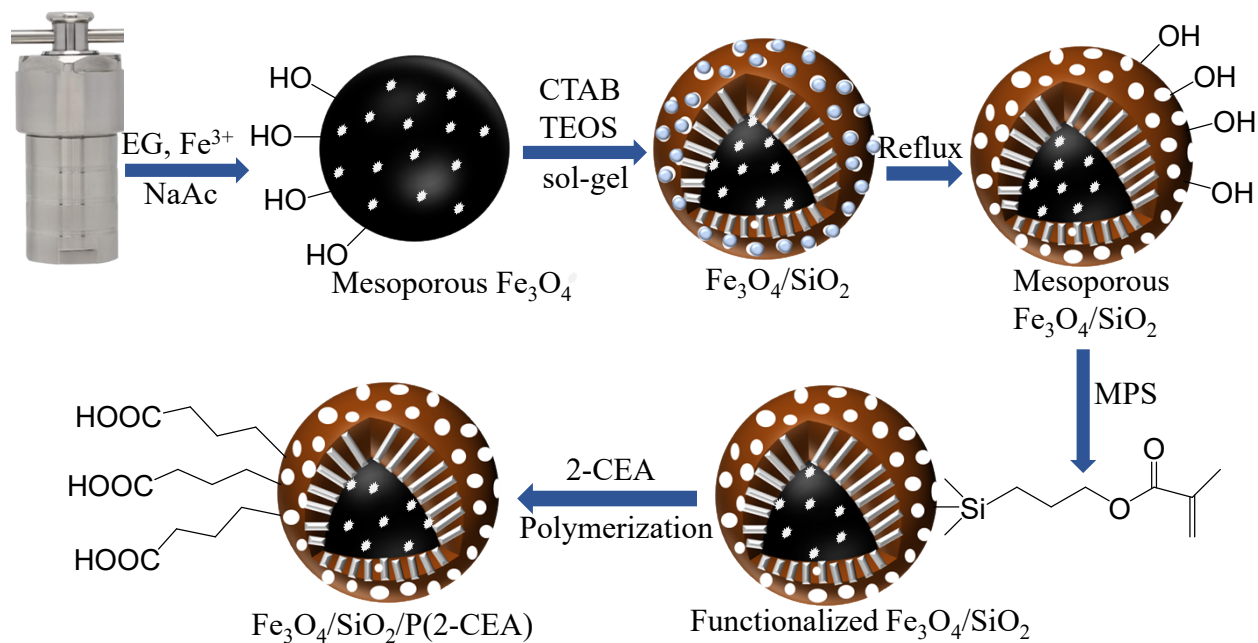

**Scheme S1** Preparation protocol of  $\text{Fe}_3\text{O}_4/\text{SiO}_2/\text{P}(2\text{-CEA})$  composite polymer particles.

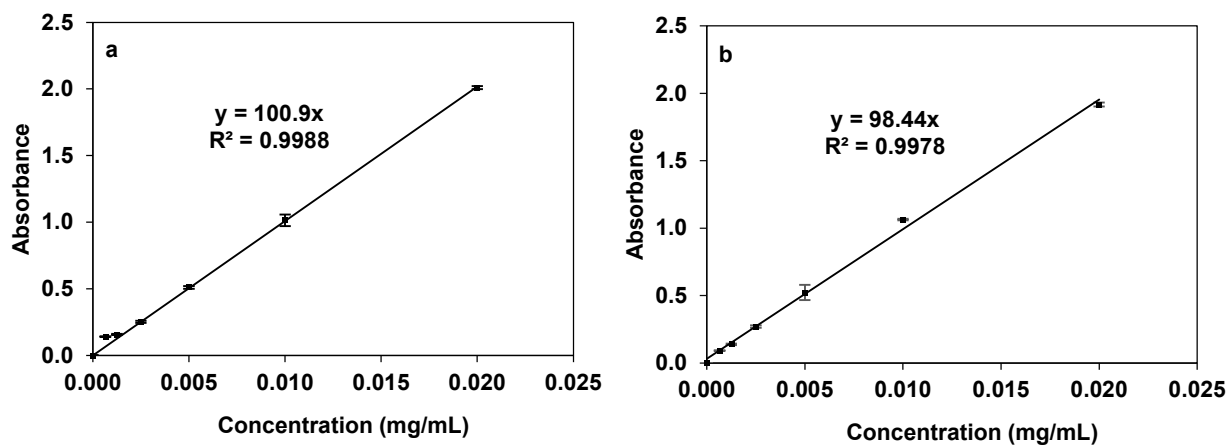

**Fig. S1** Calibration curves of cationic MB at pH values of (a) 4.0 and (b) 10.0 recorded by a UV-visible spectrophotometer at the wavelength of 662 nm.

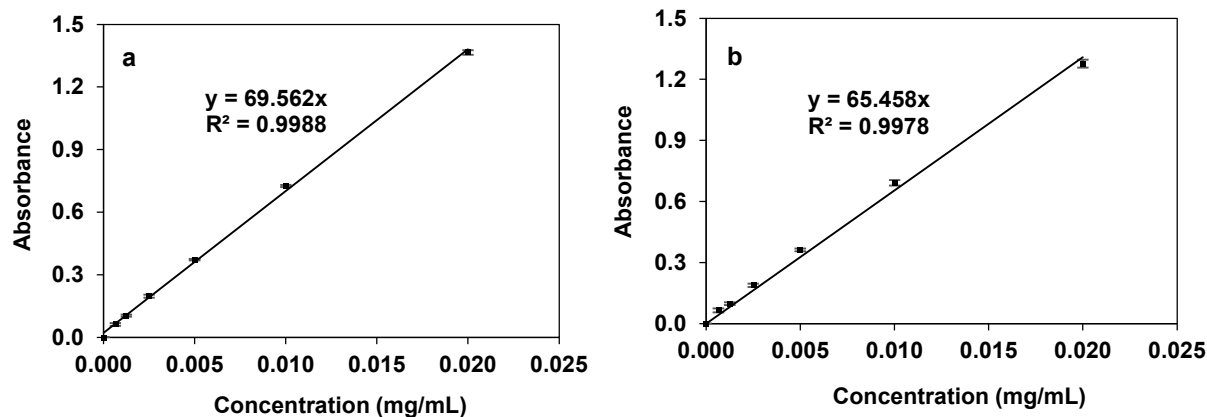

**Fig. S2** Calibration curves of anionic MO at pH values of (a) 4.0 and (b) 10.0 recorded by a UV-visible spectrophotometer at the wavelength of 465 nm.

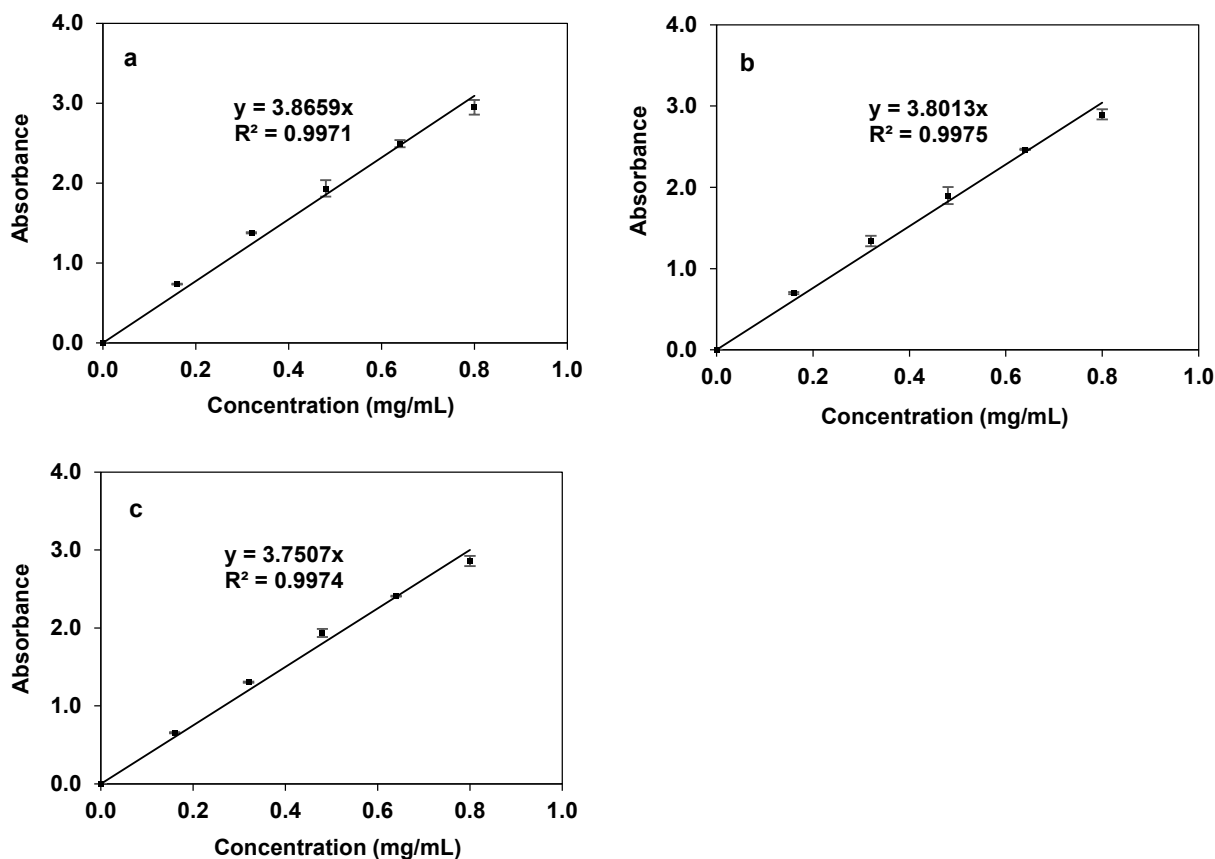

**Fig. S3** Calibration curves of vancomycin at pH values of (a) 4.0, (b) 8.0 and (c) 10.0 recorded by a UV-visible spectrophotometer at the wavelength of 280 nm.

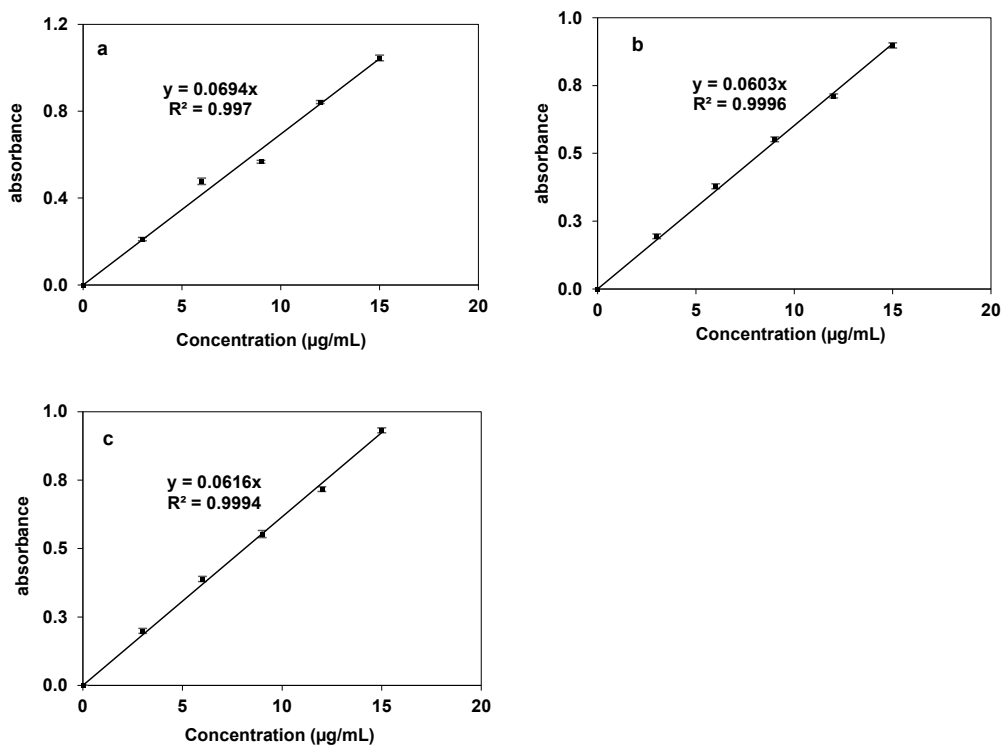

**Fig. S4** Calibration curves of *p*-AP at pH values of (a) 4.0, (b) 8.0 and (c) 10.0 recorded by a UV-visible spectrophotometer at the wavelength of 243 nm.

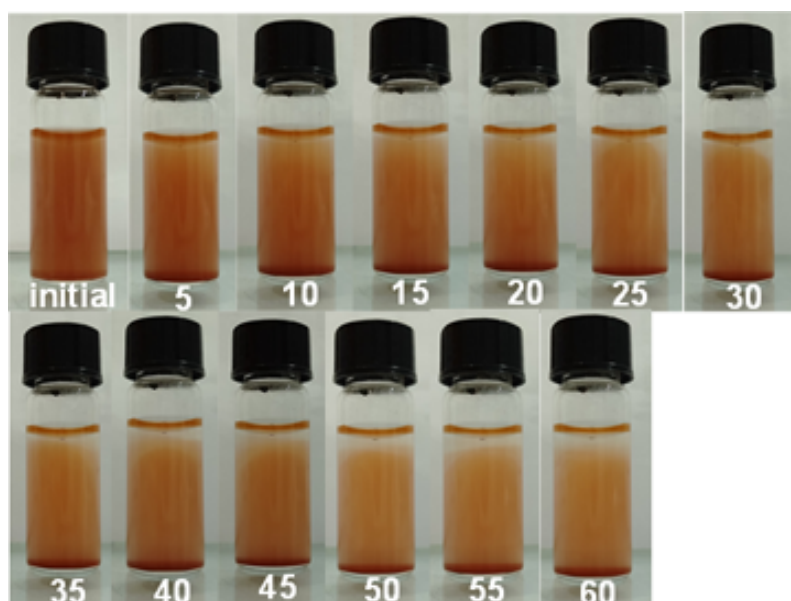

**Fig. S5** Time (min) dependent digital images of washed aqueous  $\text{Fe}_3\text{O}_4/\text{SiO}_2/\text{P}(2\text{-CEA})$  composite polymer suspension.

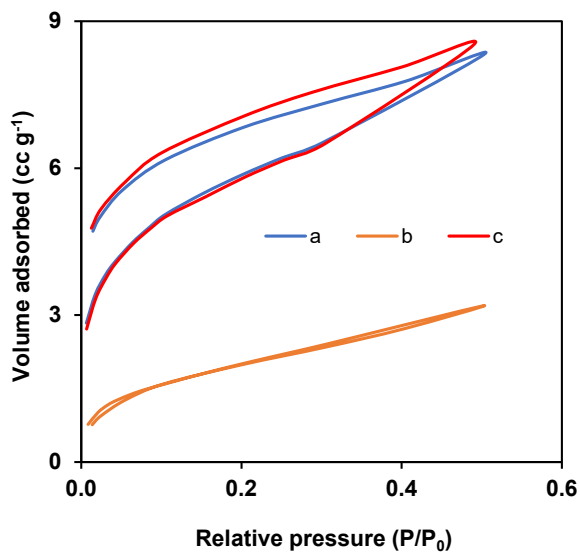

**Fig. S6** N<sub>2</sub> adsorption-desorption isotherms of (a) Fe<sub>3</sub>O<sub>4</sub> core-particles, (b) Fe<sub>3</sub>O<sub>4</sub>/SiO<sub>2</sub> composite seed particles and (c) Fe<sub>3</sub>O<sub>4</sub>/SiO<sub>2</sub>/P(2-CEA) composite polymer particles.

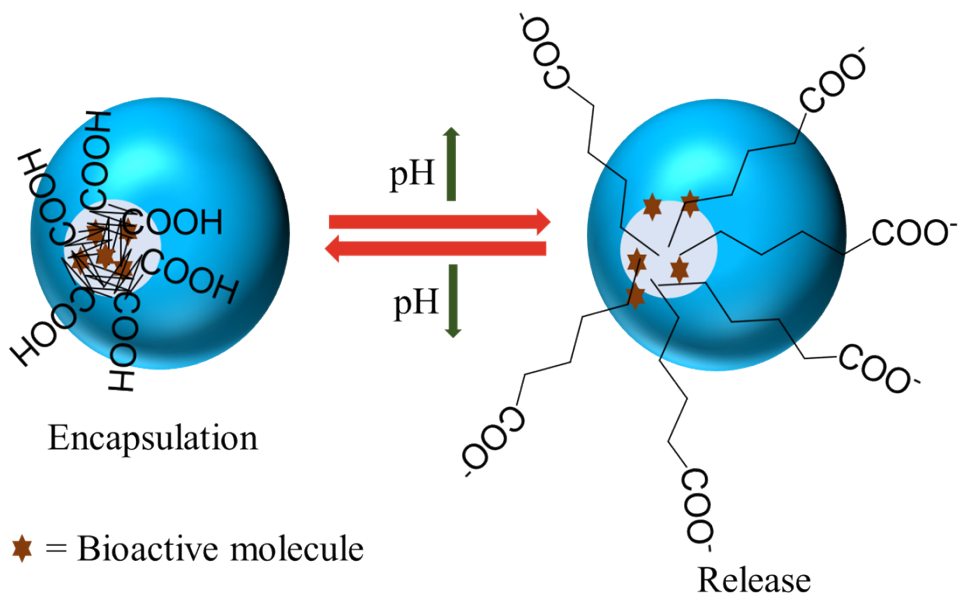

**Fig. S7** Mechanism of drug loading and release from Fe<sub>3</sub>O<sub>4</sub>/SiO<sub>2</sub>/P(2-CEA) composite polymer particles.

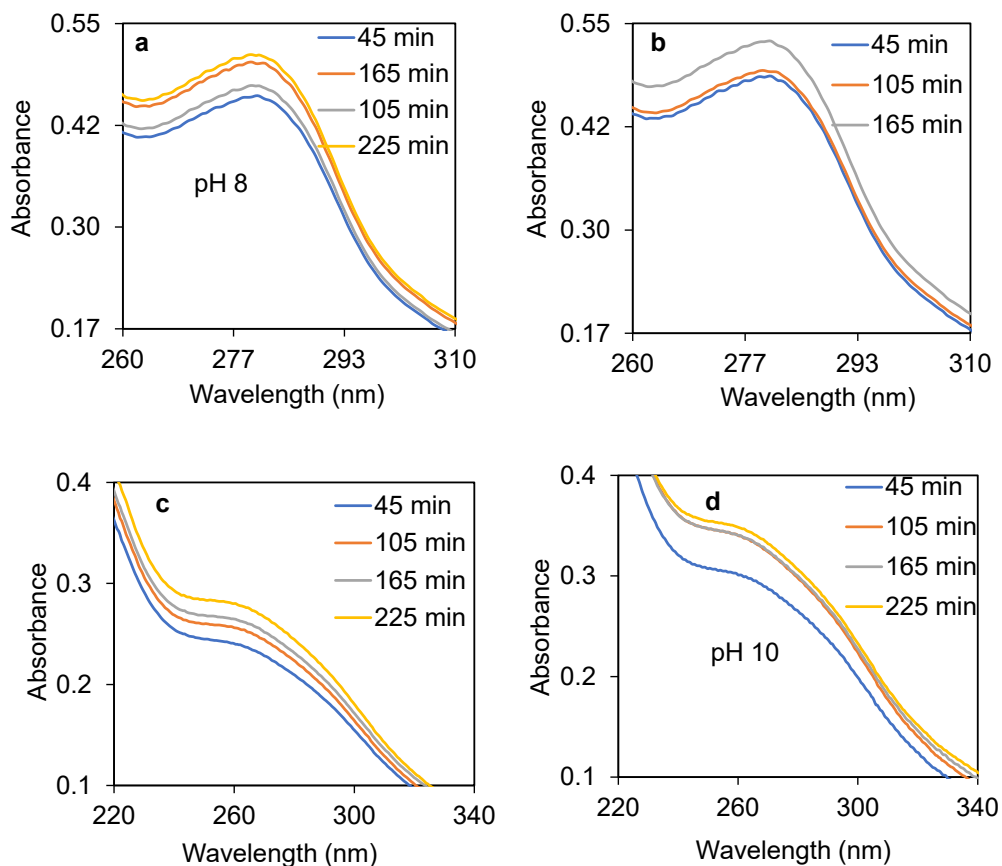

**Fig. S8** Time dependent release profiles of (a, b) vancomycin and (c, d) *p*-AP from  $\text{Fe}_3\text{O}_4/\text{SiO}_2/\text{P}(2\text{-CEA})$  composite polymer particles at pH (a, c) 8.0 and (b, d) 10.0.

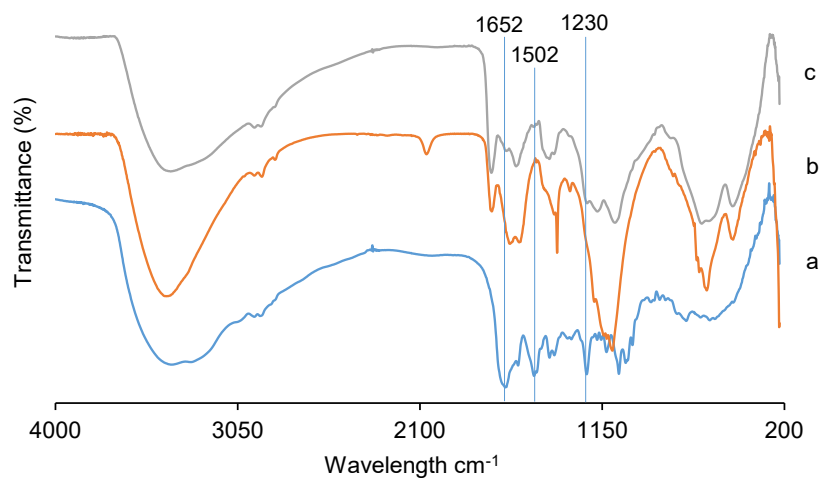

**Fig. S9** FTIR spectra of (a) vancomycin, (b)  $\text{Fe}_3\text{O}_4/\text{SiO}_2/\text{P}(2\text{-CEA})$  composite polymer particles and (c) vancomycin loaded composite polymer particles.

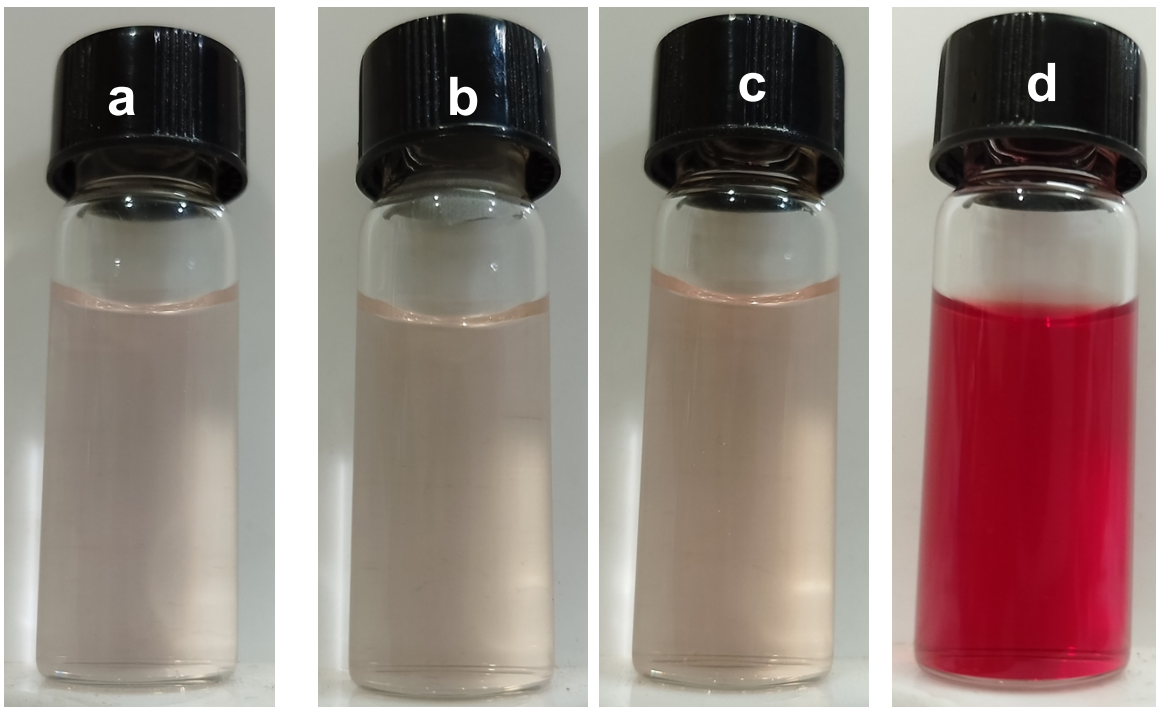

**Fig. S10** Digital images of supernatants of human RBCs incubated with (a) no particle: negative control, (b)  $\text{Fe}_3\text{O}_4/\text{SiO}_2$  composite seed, particles (c)  $\text{Fe}_3\text{O}_4/\text{SiO}_2/\text{P}(2\text{-CEA})$  composite polymer particles and (d) triton X-100. Conditions: composite particles  $0.6 \text{ mg mL}^{-1}$ ; pH, 7.4; temperature,  $37 \text{ }^\circ\text{C}$  and incubation time, 1 h.
